# Supplementary material for: Assembly, annotation and analysis of the complete mitochondrial genome of a neotropic lineage of Ligula intestinalis (Cestoda: Diphyllobothriidea): Insights into Evolution and Phylogenetics
Source: Research Square preprint supplement (doi:10.21203/rs.3.rs-6241047/v1), 2025-04-04
Supplement: Supplementary file 1 [file 091178bad0dd5d3cbedd5db4.xlsx]

## Sheet: Table 2
Ligula intestinalis	Size (bp)	A%	T%	G%	C%	A+T (%)	G+C (%)	AT-skew	GC-skew
Mitogenome	13657	22.88	43.44	20.58	13.1	66.32	33.68	-0.310012	0.22209
atp6	510	20.2	46.08	20.39	13.33	66.28	33.72	-0.390465	0.209371
cox1	1566	20.82	44.19	20.75	14.24	65.01	34.99	-0.359483	0.186053
cox2	570	24.04	39.3	22.81	13.86	63.34	36.67	-0.240922	0.244069
cox3	643	20.06	47.59	19.91	12.44	67.65	32.35	-0.406948	0.230912
cytb	1107	22.13	43	20.42	14.45	65.13	34.87	-0.320436	0.171207
nad1	891	20.09	45.12	22.67	12.12	65.21	34.79	-0.383837	0.303248
nad2	879	19.34	47.9	20.14	12.63	67.24	32.77	-0.424747	0.229173
nad3	346	18.79	48.55	19.94	12.72	67.34	32.66	-0.441936	0.221066
nad4	1251	17.59	47.56	21.1	13.75	65.15	34.85	-0.460015	0.210904
nad4L	261	24.9	47.13	17.24	10.73	72.03	27.97	-0.308621	0.232749
nad5	1569	22.94	41.11	20.78	15.17	64.05	35.95	-0.283685	0.15605
nad6	459	20.48	47.28	21.79	10.46	67.76	32.25	-0.395514	0.351318
PCGs	10052	20.82	44.81	20.85	13.52	65.63	34.37	-0.365534	0.213267
tRNAs	1396	28.37	38.4	20.85	12.39	66.77	33.24	-0.150217	0.254513
rRNAs	1679	28.83	38.95	19.59	12.63	67.78	32.22	-0.149307	0.216015
Control region	218	23.85	50.46	18.35	7.34	74.31	25.69	-0.358	0.428
NCRs	442	27.6	47.29	16.52	8.6	74.89	25.12	-0.262919	0.315287
