# Supplementary material for: Assembly, annotation and analysis of the complete mitochondrial genome of a neotropic lineage of Ligula intestinalis (Cestoda: Diphyllobothriidea): Insights into Evolution and Phylogenetics
Source: Research Square preprint supplement (doi:10.21203/rs.3.rs-6241047/v1), 2025-04-04
Supplement: Supplementary file 2 [file 0fb7edc3bdca4cc5daaafd89.xlsx]

## Sheet: Table 3. SSRs of L. intestinali
Specie	mtSSR	SSR type	N.º repeats	Size (pb)	Start	End	Location region
L. intestinalis	T	Mono	(T)9	9	280	280	atp6
	T	Mono	(T)9	9	561	569	atp6
	T	Mono	(T)9	9	8939	8947	nd5
	T	Mono	(T)10	10	12508	12517	nd4
	T	Mono	(T)11	11	3591	3601	cox1
	AC	Di	(AC)4	8	8643	8650	nd5
	TATT	Tetra	(TACTT)3	12	7966	7977	Intergenic region (NCR1)
