# Supplementary material for: Assembly, annotation and analysis of the complete mitochondrial genome of a neotropic lineage of Ligula intestinalis (Cestoda: Diphyllobothriidea): Insights into Evolution and Phylogenetics
Source: Research Square preprint supplement (doi:10.21203/rs.3.rs-6241047/v1), 2025-04-04
Supplement: Supplementary file 3 [file 1f9b195f4d76ecbeeeda96f3.docx]

**Assembly, annotation and analysis of the complete mitochondrial genome of *Ligula intestinalis* (Cestoda: Diphyllobothriidea): Insights into Evolution and Phylogenetics**

Aarón Mondragón-Martínez1,2,*, Rosa Martínez-Rojas1, Inés Gárate3, Jaime R. Sanchez-Venegas4, Gerald Moreno-Morales5, Lidia Cruz-Neyra6, Celso Luis Cruces6, Enrique Garcia-Candela7,8, Frank Guzman Escudero9, Jhon D. Chero10, Jefferson Yunis-Aguinaga11

**Figure S1.**  Predicted secondary structures of L. intestinalis tRNAs lacking DHU arms. The tRNAs are labeled with the standard amino acid abbreviations and their positions in the mitochondrial genome.

**
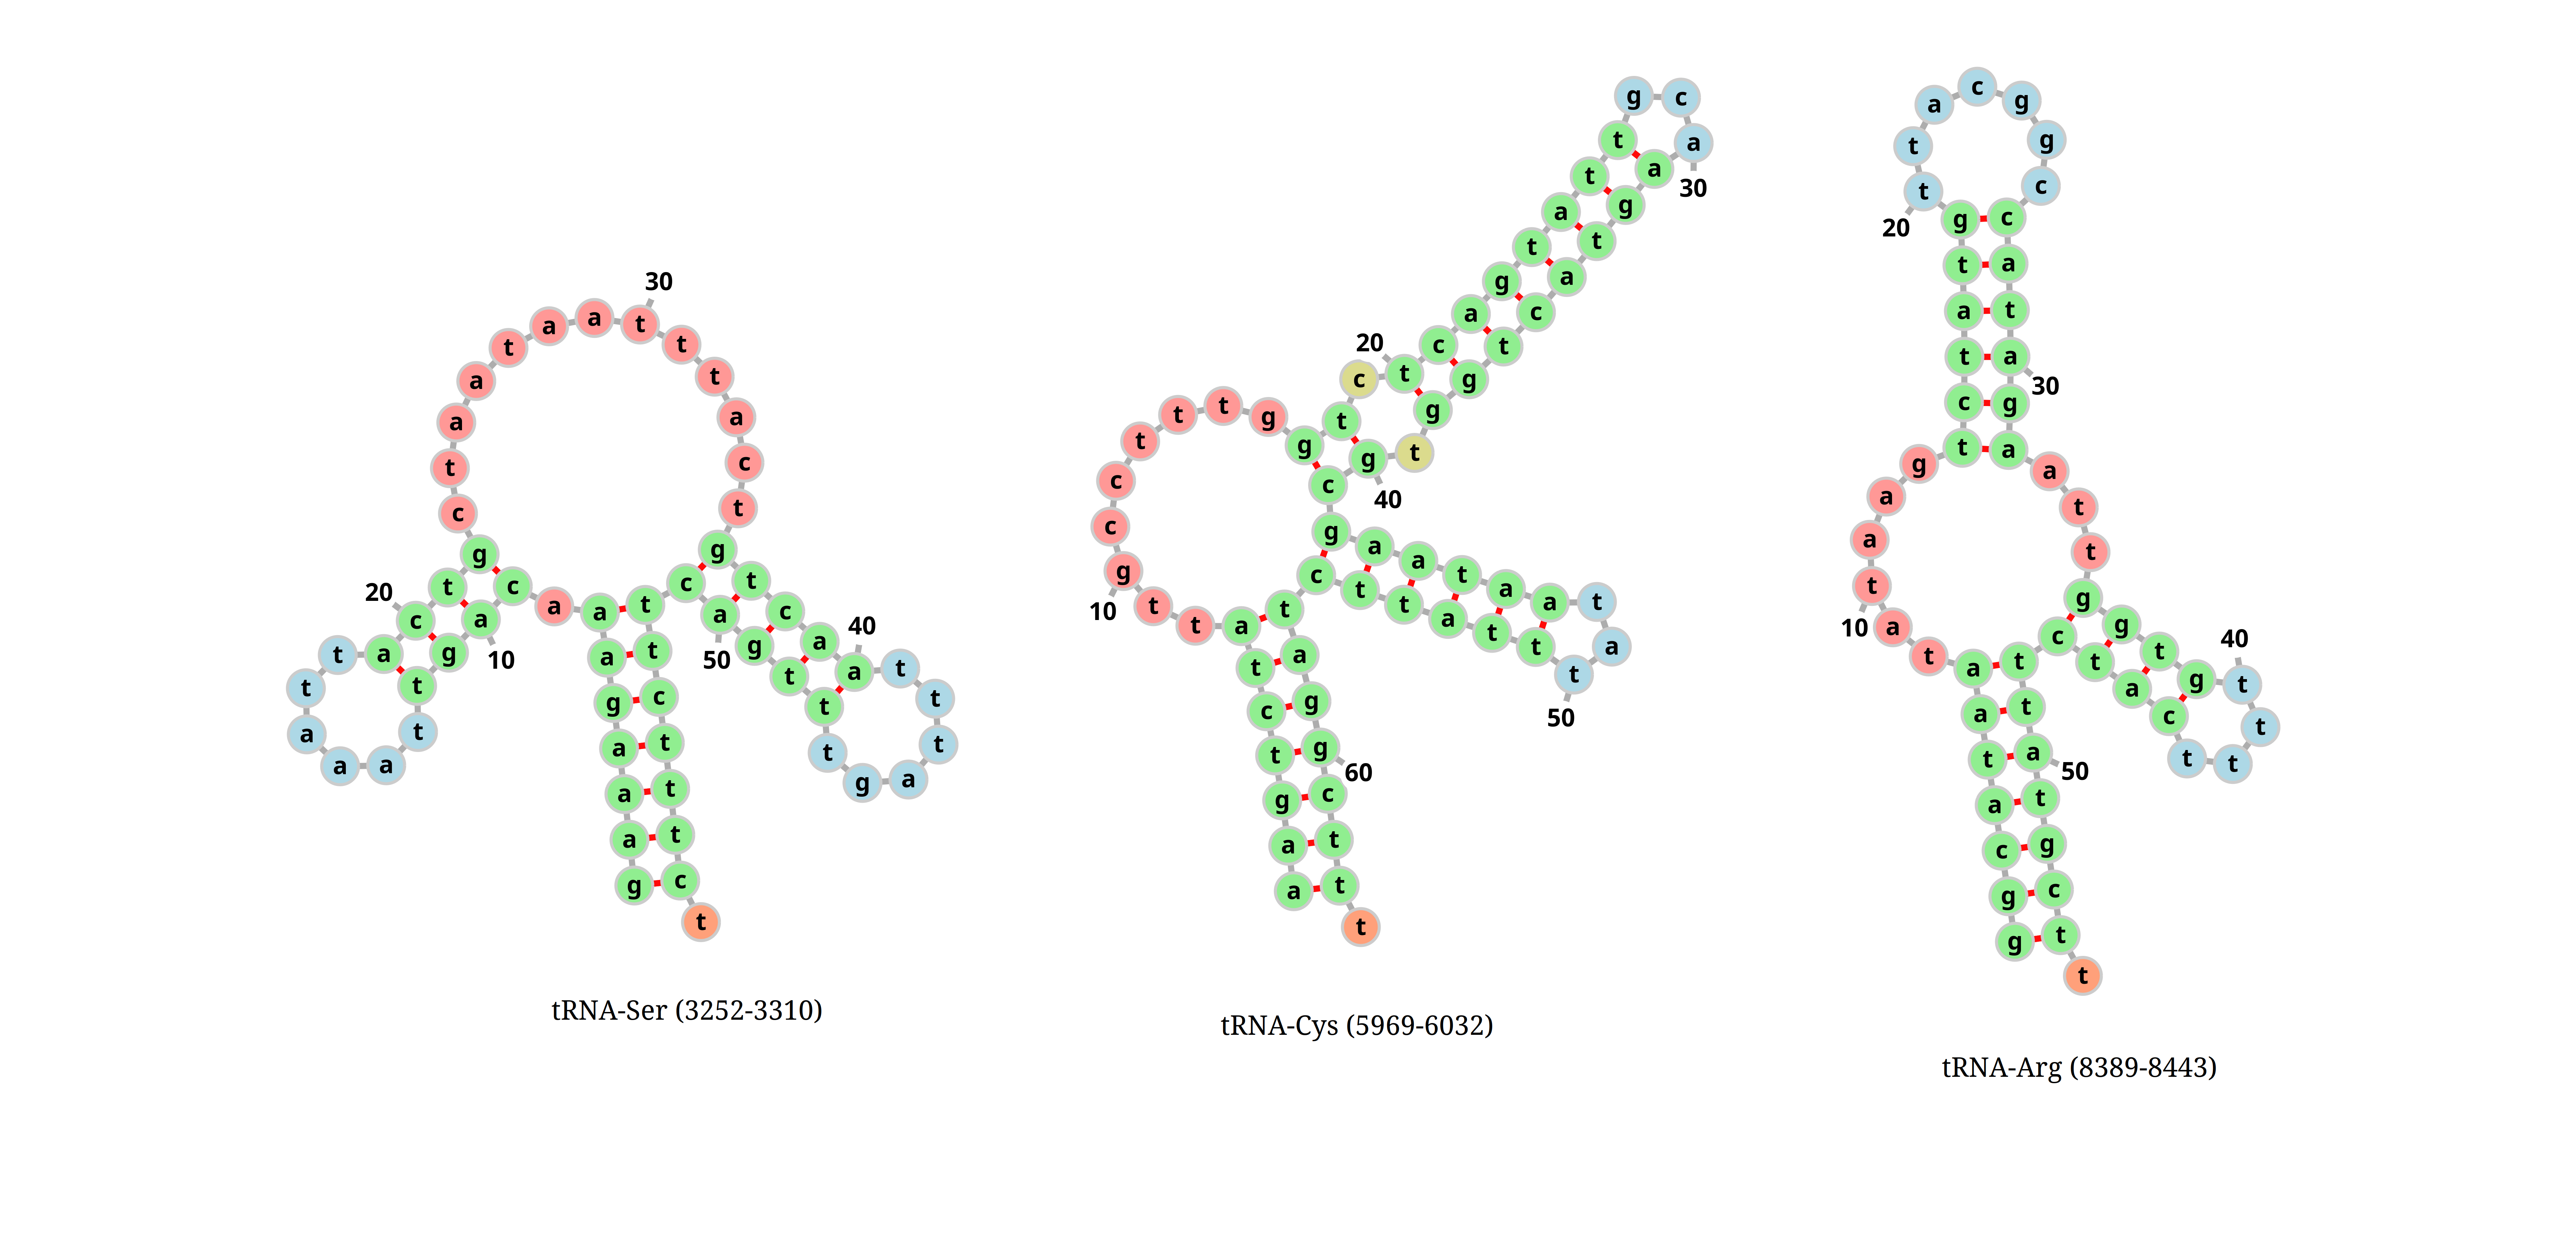
**


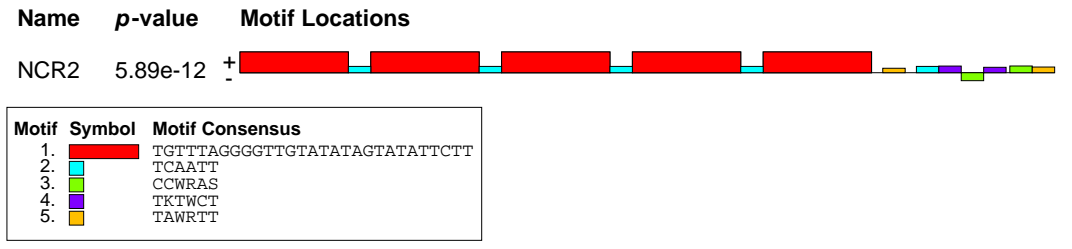
**Figure S2.** Motifs located in the non-coding region 2 (NCR2) of L. intestinalis. Tandem repeat motifs are represented by red and sky blue boxes, while other variable motifs are highlighted in different colors.
