# Supplementary material for: Assembly, annotation and analysis of the complete mitochondrial genome of a neotropic lineage of Ligula intestinalis (Cestoda: Diphyllobothriidea): Insights into Evolution and Phylogenetics
Source: Research Square preprint supplement (doi:10.21203/rs.3.rs-6241047/v1), 2025-04-04
Supplement: Supplementary file 4 [file 439115c567226d7e19f5465e.xlsx]

## Sheet: Table 1
		Gene	Position		Size (pb)	Intergenic nucleotides	Codon Start	Stop	Anti-codon
			From	To
		TrnF	1	60	60				GAA
		TrnM	61	127	67				CAT
		ATP6	131	640	510		ATG	TAA
		ND2	643	1521	879		ATG	TAG
		TrnV	1523	1586	64				TAC
		TrnA	1595	1655	61				TGC
		TrnD	1659	1722	64				GTC
		ND1	1723	2613	891	-1	ATG	TAG
		TrnN	2613	2678	66				GTT
		TrnP	2686	2750	65				TGG
		TrnI	2759	2823	65				GAT
		TrnK	2841	2904	64				CTT
		ND3	2906	3251	346		ATG	TAG
		TrnS1	3252	3310	59				TGA
		TrnW	3313	3375	63				TCA
		Cox1	3384	4949	1566	-10	ATG	TAG
		TrnT	4940	5001	62				TGT
		rrnL	5002	5968	967
		TrnC	5969	6032	64				GCA
		rrnS	6033	6744	712
		Cox2	6776	7345	570		ATG	TAA
		TrnE	7347	7411	65				TTC
		ND6	7417	7875	459		ATG	TAG
		TrnY	7879	7944	66				GTA
		TrnL1	8169	8235	67				TAG
		TrnS2	8248	8313	66				GCT
		TrnL2	8325	8388	64				TAA
		TrnR	8389	8443	55				ACG
		ND5	8447	10015	1567		ATG	TAA
		TrnG	10234	10299	66				TCC
		COX3	10303	10945	643		GTG	T
		TrnH	10946	11012	67				GTG
		CYTB	11016	12122	1107		ATG	TAA
		ND4L	12124	12384	261	-40	ATG	TAA
		ND4	12345	13595	1251		ATG	TAG
		TrnQ	13599	13654	56				GTG
