# Supplementary material for: Assembly, annotation and analysis of the complete mitochondrial genome of a neotropic lineage of Ligula intestinalis (Cestoda: Diphyllobothriidea): Insights into Evolution and Phylogenetics
Source: Research Square preprint supplement (doi:10.21203/rs.3.rs-6241047/v1), 2025-04-04
Supplement: Supplementary file 5 [file 7f40a4758b68095aa07e0681.xlsx]

## Sheet: Supplementary Data 1
Supplementary Data 1. OmicBox blast results for the L. intestinalis mitogenome protein coding genes
	Biological process
GO-id	GO-term	#Seqs	%
GO:0034654	nucleobase-containing compound biosynthetic process	1	3.57
GO:0019693	ribose phosphate metabolic process	1	3.57
GO:0098660	inorganic ion transmembrane transport	4	14.29
GO:0090407	organophosphate biosynthetic process	1	3.57
GO:0006163	purine nucleotide metabolic process	1	3.57
GO:0072522	purine-containing compound biosynthetic process	1	3.57
GO:0006810	transport	4	14.29
GO:1901137	carbohydrate derivative biosynthetic process	1	3.57
GO:0006091	generation of precursor metabolites and energy	7	25
GO:0006139	nucleobase-containing compound metabolic process	1	3.57
GO:0034220	monoatomic ion transmembrane transport	4	14.29
GO:0006793	phosphorus metabolic process	1	3.57
GO:0055086	nucleobase-containing small molecule metabolic process	1	3.57
	Cellular component
GO-id	GO-term	#Seqs	%
GO:0043229	intracellular organelle	3	17.65
GO:0033177	proton-transporting two-sector ATPase complex, proton-transporting domain	1	5.88
GO:0043227	membrane-bounded organelle	3	17.65
GO:0016469	proton-transporting two-sector ATPase complex	1	5.88
GO:1902495	transmembrane transporter complex	2	11.77
GO:1990204	oxidoreductase complex	1	5.88
GO:0045277	respiratory chain complex IV	1	5.88
GO:0070069	cytochrome complex	1	5.88
GO:0045259	proton-transporting ATP synthase complex	1	5.88
GO:0005739	mitochondrion	3	17.65
	Molecular function
GO-id	GO-term	#Seqs	%
GO:0046914	transition metal ion binding	1	3.13
GO:0048038	quinone binding	1	3.13
GO:0015318	inorganic molecular entity transmembrane transporter activity	7	21.87
GO:0016651	oxidoreductase activity, acting on NAD(P)H	4	12.5
GO:0020037	heme binding	1	3.13
GO:0016675	oxidoreductase activity, acting on a heme group of donors	3	9.37
GO:0015075	monoatomic ion transmembrane transporter activity	7	21.87
GO:0016679	oxidoreductase activity, acting on diphenols and related substances as donors	1	3.13
GO:0022804	active transmembrane transporter activity	7	21.87

## Sheet: Supplementary Data 2 
Supplementary Data 2. Amino acid frequency
		%	%	%
Amino acid	IUPAC	MW602520	NC_039445	OR756289
Ala	A:	3.5	3.44	3.23
Cys	C:	3.59	3.53	3.62
Asp	D:	1.94	1.94	2.01
Glu	E:	1.97	1.97	1.98
Phe	F:	11.49	11.46	11.41
Gly	G:	7.03	6.88	7.04
His	H:	1.68	1.71	1.71
Ile	I:	7.27	7.69	7.87
Lys	K:	1.56	1.56	1.59
Leu	L:	15.85	15.97	15.81
Met	M:	2.72	2.69	2.63
Asn	N:	3.14	3.17	2.87
Pro	P:	2.57	2.54	2.6
Gln	Q:	0.72	0.69	0.69
Arg	R:	1.62	1.56	1.59
Ser	S:	10.59	10.89	10.9
Thr	T:	3.56	3.53	3.62
Val	V:	10.17	9.69	9.88
Trp	W:	2.9	2.93	2.75
Tyr	Y:	3.9	6.16	6.2

## Sheet: Supplementary Data 3
Supplementary Data 3. Synonymous substitutions (dS), non-synonymous substitutions (dN), and dN/dS ratios
PCGs	dN/dS	dN	dS
ATP6	0.15625	0.05	0.32
ND2	0.06	0.03	0.5
ND1	0.02	0.01	0.49
ND3	0.0545	0.03	0.55
COX1	0	0	0.49
COX2	0.0232	0.01	0.43
ND6	0.0833	0.04	0.48
ND5	0.0816	0.04	0.49
COX3	0.0612	0.03	0.49
CYTB	0.0444	0.02	0.45
ND4L	0.025	0.01	0.4
ND4	0.0555	0.03	0.54

## Sheet: Supplementary Data 4
Supplementary Data 3. Relative synonymous codon usage is given in parentheses following the codon frequency
Supplementary Data 4. Relative Synonymous Codon Usage (RSCU)
Domain: Data
Codon	Count	RSCU	Codon	Count	RSCU	Codon	Count	RSCU	Codon	Count	RSCU
UUU(F)	323	1.64	UCU(S)	87	2.2	UAU(Y)	152	1.63	UGU(C)	118	1.45
UUC(F)	72	0.36	UCC(S)	21	0.53	UAC(Y)	51	0.55	UGC(C)	45	0.55
UUA(L)	171	2.22	UCA(S)	52	1.31	UAA(Y)	77	0.83	UGA(W)	51	0.74
UUG(L)	117	1.52	UCG(S)	22	0.56	UAG(*)	60	1	UGG(W)	86	1.26
CUU(L)	75	0.97	CCU(P)	33	1.61	CAU(H)	46	1.33	CGU(R)	27	1.83
CUC(L)	17	0.22	CCC(P)	18	0.88	CAC(H)	23	0.67	CGC(R)	10	0.68
CUA(L)	44	0.57	CCA(P)	20	0.98	CAA(Q)	32	1.14	CGA(R)	13	0.88
CUG(L)	38	0.49	CCG(P)	11	0.54	CAG(Q)	24	0.86	CGG(R)	9	0.61
AUU(I)	147	1.85	ACU(T)	54	1.82	AAU(N)	47	1.58	AGU(S)	69	1.74
AUC(I)	36	0.45	ACC(T)	25	0.84	AAC(N)	11	0.37	AGC(S)	19	0.48
AUA(I)	55	0.69	ACA(T)	28	0.94	AAA(N)	31	1.04	AGA(S)	22	0.56
AUG(M)	62	1	ACG(T)	12	0.4	AAG(K)	35	1	AGG(S)	25	0.63
GUU(V)	153	1.99	GCU(A)	51	2.06	GAU(D)	50	1.47	GGU(G)	102	1.97
GUC(V)	31	0.4	GCC(A)	15	0.61	GAC(D)	18	0.53	GGC(G)	25	0.48
GUA(V)	54	0.7	GCA(A)	21	0.85	GAA(E)	21	0.93	GGA(G)	20	0.39
GUG(V)	70	0.91	GCG(A)	12	0.48	GAG(E)	24	1.07	GGG(G)	60	1.16
Average# codons=3350
																								Supplementary Data 4.

## Sheet: Supplementary Data 5
Supplementary Data 5. Palindrome, Foward and Reverse
>PALINDROME	START TO END	LENGHT (bp)	FRECUENCY REPEAT
AGTTATAACT	( 2046 TO 2055 )	10	1
ATATTAATAT	( 10009 TO 10018 )	10	1
ATGATATCAT	( 6746 TO 6755 )	10	1
ATTAATTAAT	( 6353 TO 6362 )	10	1
CAGTATACTG	( 13525 TO 13534 )	10	1
CTTAATTAAG	( 8527 TO 8536 )	10	1
GTGTTAACAC	( 12331 TO 12340 )	10	1
TAAATATTTA	( 7962 TO 7971 )	10	1
TAATATATTA	( 10005 TO 10014 )	10	1
TTAACGTTAA	( 2645 TO 2654 )	10	1
TTACTAGTAA	( 9962 TO 9971 )	10	1
AAGACAGCTGTCTT	( 4281 TO 4294 )	14	1
>FOWARD	START TO END	LENGHT (bp)	FRECUENCY REPEAT
TTTAGGGGTTGTATATAGTATATTCTTTCAATTTGTTTAGGGGTTGTATATAGTATA	( 10018 TO 10074 )( 10123 TO 10179 )	57	2
TTTAGGGGTTGTATATAGTATA	( 10018 TO 10039 )( 10158 TO 10179 )	22	2
GGTATTTATCGTTGCAC	( 10858 TO 10874 )( 12984 TO 13000 )	17	2
CAATGTATTTTATTAA	( 1525 TO 1540 )( 1597 TO 1612 )	16	2
TTTTAGTAACAATGT	( 1588 TO 1602 )( 8294 TO 8308 )	15	2
TTTGCTGTTTTTTAT	( 2490 TO 2504 )( 11879 TO 11893 )	15	2
TTTTCTTTGTTATA	( 6782 TO 6795 )( 8877 TO 8890 )	14	2
TAAGTCTTTTGGTT	( 1763 TO 1776 )( 1905 TO 1918 )	14	2
GGGGGTTTATGAAG	( 2455 TO 2468 )( 8552 TO 8565 )	14	2
GGCACATTATATTT	( 12269 TO 12282 )( 13612 TO 13625 )	14	2
CTCAAGCCTATTTT	( 1116 TO 1129 )( 4993 TO 5006 )	14	2
TTTTTTTTTATGA	( 272 TO 284 )( 561 TO 573 )	13	2
TTTTTTATTTTTG	( 1335 TO 1347 )( 8227 TO 8239 )	13	2
TTTTTATTTTTGG	( 3179 TO 3191 )( 8228 TO 8240 )	13	2
TTTTGTGGGTGTT	( 700 TO 712 )( 10803 TO 10815 )	13	2
TTTTAGTTTTTTA	( 1038 TO 1050 )( 13535 TO 13547 )	13	2
TTCAGTTTTTTTG	( 861 TO 873 )( 13366 TO 13378 )	13	2
TGTTTTGGTGCCG	( 491 TO 503 )( 3741 TO 3753 )	13	2
TGTTATTCTTGGT	( 11534 TO 11546 )( 11549 TO 11561 )	13	2
TATAGGGGGTGTT	( 4433 TO 4445 )( 7386 TO 7398 )	13	2
GTTATTAATATTT	( 6295 TO 6307 )( 12395 TO 12407 )	13	2
GGTGCCTTTATTT	( 2924 TO 2936 )( 12878 TO 12890 )	13	2
CTAAATTAGTTTG	( 6388 TO 6400 )( 6627 TO 6639 )	13	2
ATGATAGTTTTGG	( 281 TO 293 )( 2709 TO 2721 )	13	2
ATCTAATAATTTA	( 10278 TO 10290 )( 13021 TO 13033 )	13	2
AGGGGTTGTATAT	( 7714 TO 7726 )( 10021 TO 10033 )( 10056 TO 10068 )( 10091 TO 10103 )( 10126 TO 10138 )( 10161 TO 10173 )	13	6
AATGATATTTTTT	( 3584 TO 3596 )( 11803 TO 11815 )	13	2
TTTTTTATATGG	( 9757 TO 9768 )( 11886 TO 11897 )	12	2
TTTTTTACCAAG	( 9452 TO 9463 )( 12867 TO 12878 )	12	2
TTTTTATTTTTG	( 1336 TO 1347 )( 3179 TO 3190 )	12	2
TTTTATGGGGTT	( 3222 TO 3233 )( 8186 TO 8197 )	12	2
TTTTATAAGTTA	( 1372 TO 1383 )( 7533 TO 7544 )	12	2
TTTGGTTTCTTT	( 7819 TO 7830 )( 12369 TO 12380 )	12	2
TTTGGCTTTTTT	( 1322 TO 1333 )( 8221 TO 8232 )	12	2
TTTATTTACTTT	( 2264 TO 2275 )( 9231 TO 9242 )	12	2
TTTAGTGGTTAT	( 137 TO 148 )( 11684 TO 11695 )	12	2
TTGGCTTTTTTA	( 8222 TO 8233 )( 13107 TO 13118 )	12	2
TTCTGTATTTAG	( 10832 TO 10843 )( 13584 TO 13595 )	12	2
TTATTCTTGGTT	( 10650 TO 10661 )( 11536 TO 11547 )	12	2
TTATGATTTTTC	( 7054 TO 7065 )( 13239 TO 13250 )	12	2
TGTTTTTATGAA	( 10358 TO 10369 )( 12639 TO 12650 )	12	2
TGTTTTAGTTTT	( 3062 TO 3073 )( 13533 TO 13544 )	12	2
TGTTTAAGTATT	( 1390 TO 1401 )( 11467 TO 11478 )	12	2
TGTTGTATAATA	( 7354 TO 7365 )( 9998 TO 10009 )	12	2
TGTTAAATTTAT	( 4861 TO 4872 )( 6976 TO 6987 )	12	2
TGTGTTATAAAT	( 521 TO 532 )( 5492 TO 5503 )	12	2
TCTGCTTTTTGG	( 10462 TO 10473 )( 13422 TO 13433 )	12	2
TATTTTTTAATT	( 8789 TO 8800 )( 11808 TO 11819 )	12	2
TATTTTATTAAA	( 1530 TO 1541 )( 5001 TO 5012 )	12	2
TATTTACTTTAC	( 1544 TO 1555 )( 9233 TO 9244 )	12	2
TATTGTTTTGGT	( 12628 TO 12639 )( 13194 TO 13205 )	12	2
TATTGGTTTATG	( 830 TO 841 )( 10916 TO 10927 )	12	2
TATTAAATGTGG	( 5006 TO 5017 )( 5329 TO 5340 )	12	2
TATCTTTGTTTC	( 9258 TO 9269 )( 13554 TO 13565 )	12	2
TATAGTAATTTT	( 2172 TO 2183 )( 3158 TO 3169 )	12	2
TAATTTTCTGTG	( 2177 TO 2188 )( 12676 TO 12687 )	12	2
TAATGAAATTTT	( 6774 TO 6785 )( 10722 TO 10733 )	12	2
TAAGATTGGGTT	( 480 TO 491 )( 3198 TO 3209 )	12	2
GTTTATTTATGG	( 9635 TO 9646 )( 11965 TO 11976 )	12	2
GCTTGTTTTTGT	( 1201 TO 1212 )( 12463 TO 12474 )	12	2
CTTTTTTTGATC	( 2553 TO 2564 )( 4036 TO 4047 )	12	2
CTTTTTTATTTT	( 1782 TO 1793 )( 8226 TO 8237 )	12	2
CTTTTTAGTTTA	( 12238 TO 12249 )( 12591 TO 12602 )	12	2
CTTACTTGGGGG	( 9469 TO 9480 )( 12013 TO 12024 )	12	2
ATTTTTTTTTAT	( 271 TO 282 )( 8938 TO 8949 )	12	2
AGTTATGTTATT	( 431 TO 442 )( 10230 TO 10241 )	12	2
AATTTGGGGGTT	( 7666 TO 7677 )( 8086 TO 8097 )	12	2
TTTTTTTTTAT	( 561 TO 571 )( 8939 TO 8949 )	11	2
TTTTTTTTATG	( 273 TO 283 )( 562 TO 572 )( 783 TO 793 )	11	3
TTTTTTTATTG	( 1952 TO 1962 )( 13188 TO 13198 )	11	2
TTTTTTATTTT	( 1335 TO 1345 )( 1783 TO 1793 )	11	2
TTTTTTATGAT	( 275 TO 285 )( 13235 TO 13245 )	11	2
TTTTTTACTTG	( 2377 TO 2387 )( 11208 TO 11218 )	11	2
TTTTTTACTAC	( 1044 TO 1054 )( 2935 TO 2945 )	11	2
TTTTTATTTTT	( 992 TO 1002 )( 1336 TO 1346 )( 3179 TO 3189 )( 8228 TO 8238 )	11	4
TTTTTATGTCA	( 786 TO 796 )( 8442 TO 8452 )	11	2
TTTTGTGGTTT	( 2033 TO 2043 )( 3097 TO 3107 )	11	2
TTTTGGTGTTT	( 12633 TO 12643 )( 13428 TO 13438 )	11	2
TTTTGATTTGA	( 8268 TO 8278 )( 10525 TO 10535 )	11	2
TTTTCTGTGGT	( 2180 TO 2190 )( 6234 TO 6244 )	11	2
TTTTATTTTTT	( 993 TO 1003 )( 7444 TO 7454 )	11	2
TTTTAATTTAT	( 4646 TO 4656 )( 11812 TO 11822 )	11	2
TTTGTTTTTTG	( 5708 TO 5718 )( 7240 TO 7250 )	11	2
TTTGTTTTTTA	( 1331 TO 1341 )( 12800 TO 12810 )	11	2
TTTGTTTCTGA	( 3209 TO 3219 )( 13558 TO 13568 )	11	2
TTTGTGGACTA	( 4920 TO 4930 )( 10897 TO 10907 )	11	2
TTTCTGTGGTT	( 6235 TO 6245 )( 10409 TO 10419 )	11	2
TTTATTTTTTT	( 994 TO 1004 )( 2930 TO 2940 )	11	2
TTTATTGTTTT	( 12280 TO 12290 )( 13192 TO 13202 )	11	2
TTTATTAAAAA	( 1533 TO 1543 )( 5440 TO 5450 )	11	2
TTTAGTTTTAC	( 676 TO 686 )( 3065 TO 3075 )	11	2
TTTAATTTTAC	( 4118 TO 4128 )( 5206 TO 5216 )	11	2
TTTAAGTTACC	( 238 TO 248 )( 5739 TO 5749 )	11	2
TTGTTTTTTTT	( 558 TO 568 )( 780 TO 790 )	11	2
TTGTTTTTTAG	( 1033 TO 1043 )( 12801 TO 12811 )	11	2
TTGTTTTGGTG	( 490 TO 500 )( 12630 TO 12640 )	11	2
TTGTTTTATGT	( 2160 TO 2170 )( 12840 TO 12850 )	11	2
TTGGGTGGGGG	( 4050 TO 4060 )( 8237 TO 8247 )	11	2
TTGGCTTTTTT	( 1323 TO 1333 )( 13107 TO 13117 )	11	2
TTCTAATTTGT	( 2276 TO 2286 )( 5928 TO 5938 )	11	2
TTATTTTATCT	( 11577 TO 11587 )( 12170 TO 12180 )	11	2
TTATTTATACT	( 3442 TO 3452 )( 12135 TO 12145 )	11	2
TTATTCTTGGT	( 10650 TO 10660 )( 11551 TO 11561 )	11	2
TTATGGGTTTA	( 1853 TO 1863 )( 11971 TO 11981 )	11	2
TTATGCTTTTT	( 4653 TO 4663 )( 8436 TO 8446 )	11	2
TTATATTTATT	( 12275 TO 12285 )( 13031 TO 13041 )	11	2
TTATATGGTAG	( 5470 TO 5480 )( 9761 TO 9771 )	11	2
TTATAGTTCTT	( 819 TO 829 )( 2004 TO 2014 )	11	2
TTACTTTTTCT	( 2269 TO 2279 )( 10989 TO 10999 )	11	2
TTACTTGGTGT	( 10681 TO 10691 )( 11212 TO 11222 )	11	2
TTAAATTTATT	( 3871 TO 3881 )( 6978 TO 6988 )	11	2
TTAAACTGTTT	( 5791 TO 5801 )( 12193 TO 12203 )	11	2
TGTTTTTAACA	( 1733 TO 1743 )( 5585 TO 5595 )	11	2
TGTTGTTTTTT	( 556 TO 566 )( 7702 TO 7712 )	11	2
TGTTAAGACAG	( 4277 TO 4287 )( 7851 TO 7861 )	11	2
TGTGTTATAAA	( 521 TO 531 )( 5492 TO 5502 )( 6429 TO 6439 )	11	3
TGGTTGTTTTT	( 4778 TO 4788 )( 8287 TO 8297 )	11	2
TGGTTAGTTAT	( 291 TO 301 )( 2213 TO 2223 )	11	2
TGATAGGTTAT	( 1703 TO 1713 )( 10950 TO 10960 )	11	2
TCTTTTGGTTT	( 1909 TO 1919 )( 10421 TO 10431 )	11	2
TCTTTGTGTCT	( 6823 TO 6833 )( 7619 TO 7629 )	11	2
TCTATTAAATT	( 3867 TO 3877 )( 10434 TO 10444 )	11	2
TCGTTATTGGC	( 9902 TO 9912 )( 11225 TO 11235 )	11	2
TATTTTTTTTT	( 3589 TO 3599 )( 8937 TO 8947 )	11	2
TATTTTTTTAT	( 1104 TO 1114 )( 8119 TO 8129 )	11	2
TATTTTTATTA	( 9139 TO 9149 )( 10246 TO 10256 )	11	2
TATTTTATTAA	( 1602 TO 1612 )( 5001 TO 5011 )	11	2
TATTTAATTTT	( 904 TO 914 )( 12672 TO 12682 )	11	2
TATTCTGTTTT	( 3716 TO 3726 )( 6217 TO 6227 )	11	2
TATTAATATTT	( 6297 TO 6307 )( 10010 TO 10020 )( 12397 TO 12407 )	11	3
TATGTTTTTAA	( 1731 TO 1741 )( 12944 TO 12954 )	11	2
TATCTTTTTTA	( 1279 TO 1289 )( 12863 TO 12873 )	11	2
TAGTCTGTTTA	( 4222 TO 4232 )( 11959 TO 11969 )	11	2
TACTGTTATTA	( 10661 TO 10671 )( 12496 TO 12506 )	11	2
TAATATTATTG	( 6490 TO 6500 )( 11036 TO 11046 )	11	2
TAAGTCTATGT	( 6536 TO 6546 )( 8398 TO 8408 )	11	2
TAAATTTAATT	( 5360 TO 5370 )( 10736 TO 10746 )	11	2
GTTTTTTTTAT	( 782 TO 792 )( 1458 TO 1468 )	11	2
GTTTTTTTGTG	( 4783 TO 4793 )( 13150 TO 13160 )( 13370 TO 13380 )	11	3
GTTTTTTATTT	( 1334 TO 1344 )( 9227 TO 9237 )	11	2
GTTTCTTTTTA	( 12373 TO 12383 )( 12483 TO 12493 )	11	2
GTTTATCTGGT	( 5024 TO 5034 )( 9423 TO 9433 )	11	2
GTTTAGTTTTA	( 675 TO 685 )( 11860 TO 11870 )	11	2
GTTGTTTTTTT	( 557 TO 567 )( 4780 TO 4790 )	11	2
GTTATTATTGA	( 10665 TO 10675 )( 11071 TO 11081 )	11	2
GTTAGTTATGT	( 293 TO 303 )( 428 TO 438 )	11	2
GTGTTCGTTAT	( 2528 TO 2538 )( 11221 TO 11231 )	11	2
GTGTATTTTCA	( 11518 TO 11528 )( 11643 TO 11653 )	11	2
GTCTGTTTATT	( 5435 TO 5445 )( 11961 TO 11971 )	11	2
GTATTTTCTGT	( 12033 TO 12043 )( 13579 TO 13589 )	11	2
GTATTGGTGTT	( 3433 TO 3443 )( 6953 TO 6963 )	11	2
GGTTGTTTTTA	( 5582 TO 5592 )( 8288 TO 8298 )	11	2
GGGGTTGATTT	( 3810 TO 3820 )( 8192 TO 8202 )	11	2
CTTTAGTGGTT	( 136 TO 146 )( 13315 TO 13325 )	11	2
CTTGGGTTAAT	( 4729 TO 4739 )( 5818 TO 5828 )	11	2
CTAATAATTTA	( 3274 TO 3284 )( 10280 TO 10290 )( 13023 TO 13033 )	11	3
ATTTTCTTTGT	( 6781 TO 6791 )( 8485 TO 8495 )	11	2
ATTTTCTGTGG	( 2179 TO 2189 )( 12035 TO 12045 )	11	2
ATTATTTAATT	( 902 TO 912 )( 5639 TO 5649 )	11	2
ATGCTATCTGG	( 5053 TO 5063 )( 13568 TO 13578 )	11	2
ATCTATTAAAT	( 5326 TO 5336 )( 10433 TO 10443 )	11	2
ATATTTTTATT	( 9541 TO 9551 )( 10245 TO 10255 )	11	2
AGTCTAGTTTA	( 7751 TO 7761 )( 13288 TO 13298 )	11	2
AGTATTTTAAA	( 5138 TO 5148 )( 6061 TO 6071 )	11	2
AATTTAATTAA	( 5362 TO 5372 )( 9950 TO 9960 )	11	2
AATGGTTGTTT	( 8285 TO 8295 )( 12291 TO 12301 )	11	2
AAGTTAATTAT	( 69 TO 79 )( 5376 TO 5386 )	11	2
AAATTTTTATA	( 813 TO 823 )( 10727 TO 10737 )	11	2
AAATAATTTAT	( 5698 TO 5708 )( 7000 TO 7010 )	11	2
TTTTTTTTTT	( 3591 TO 3600 )( 3592 TO 3601 )( 12508 TO 12517 )	10	3
TTTTTTTTTA	( 272 TO 281 )( 561 TO 570 )( 8939 TO 8948 )( 12509 TO 12518 )	10	4
TTTTTTTTAT	( 273 TO 282 )( 562 TO 571 )( 783 TO 792 )( 1459 TO 1468 )( 8940 TO 8949 )	10	5
TTTTTTTTAC	( 2375 TO 2384 )( 9450 TO 9459 )	10	2
TTTTTTTGGT	( 866 TO 875 )( 998 TO 1007 )	10	2
TTTTTTTGAT	( 2554 TO 2563 )( 3595 TO 3604 )( 4037 TO 4046 )	10	3
TTTTTTTATT	( 1952 TO 1961 )( 8121 TO 8130 )( 8941 TO 8950 )( 13188 TO 13197 )	10	4
TTTTTTTATG	( 274 TO 283 )( 563 TO 572 )( 784 TO 793 )( 1106 TO 1115 )	10	4
TTTTTTTATA	( 1460 TO 1469 )( 6282 TO 6291 )	10	2
TTTTTTTACT	( 2376 TO 2385 )( 2934 TO 2943 )	10	2
TTTTTTGTGG	( 3095 TO 3104 )( 13152 TO 13161 )	10	2
TTTTTTATTT	( 1335 TO 1344 )( 1783 TO 1792 )( 8122 TO 8131 )( 8227 TO 8236 )( 9228 TO 9237 )	10	5
TTTTTTATGT	( 785 TO 794 )( 2497 TO 2506 )	10	2
TTTTTTATGA	( 564 TO 573 )( 13235 TO 13244 )	10	2
TTTTTTATAT	( 1461 TO 1470 )( 9757 TO 9766 )( 11886 TO 11895 )	10	3
TTTTTTAGTT	( 1036 TO 1045 )( 4293 TO 4302 )	10	2
TTTTTGTGGG	( 10802 TO 10811 )( 13153 TO 13162 )	10	2
TTTTTCTTTG	( 3079 TO 3088 )( 10993 TO 11002 )	10	2
TTTTTATTTT	( 992 TO 1001 )( 1784 TO 1793 )( 3179 TO 3188 )	10	3
TTTTTATTTA	( 2246 TO 2255 )( 9229 TO 9238 )	10	2
TTTTTATTGG	( 911 TO 920 )( 1954 TO 1963 )	10	2
TTTTTATTAT	( 8943 TO 8952 )( 10248 TO 10257 )	10	2
TTTTTATCTT	( 1284 TO 1293 )( 7788 TO 7797 )	10	2
TTTTTAGTTT	( 1037 TO 1046 )( 12239 TO 12248 )( 12592 TO 12601 )	10	3
TTTTTACTTT	( 3412 TO 3421 )( 9513 TO 9522 )	10	2
TTTTTAAGCT	( 6527 TO 6536 )( 13113 TO 13122 )	10	2
TTTTGTATTT	( 966 TO 975 )( 12667 TO 12676 )	10	2
TTTTGGTTCT	( 4086 TO 4095 )( 12763 TO 12772 )	10	2
TTTTGGTTAT	( 1769 TO 1778 )( 13623 TO 13632 )	10	2
TTTTGGTTAG	( 288 TO 297 )( 1001 TO 1010 )	10	2
TTTTGGTGCC	( 493 TO 502 )( 2920 TO 2929 )( 3743 TO 3752 )	10	3
TTTTGGTGAT	( 3186 TO 3195 )( 8860 TO 8869 )	10	2
TTTTCTTTTG	( 695 TO 704 )( 10418 TO 10427 )	10	2
TTTTCTTTGT	( 6782 TO 6791 )( 8486 TO 8495 )( 8877 TO 8886 )( 10994 TO 11003 )	10	4
TTTTCTGTGG	( 6234 TO 6243 )( 12036 TO 12045 )	10	2
TTTTCATTTT	( 2414 TO 2423 )( 11257 TO 11266 )	10	2
TTTTCACTAT	( 4426 TO 4435 )( 4514 TO 4523 )	10	2
TTTTATTTTT	( 231 TO 240 )( 993 TO 1002 )( 1337 TO 1346 )( 3180 TO 3189 )( 7444 TO 7453 )( 8229 TO 8238 )	10	6
TTTTATTATT	( 11263 TO 11272 )( 11698 TO 11707 )	10	2
TTTTATCTTT	( 7789 TO 7798 )( 12173 TO 12182 )( 12860 TO 12869 )	10	3
TTTTATCTAC	( 11580 TO 11589 )( 12489 TO 12498 )	10	2
TTTTAGTTTT	( 1038 TO 1047 )( 3064 TO 3073 )	10	2
TTTTAGTTTA	( 2690 TO 2699 )( 12240 TO 12249 )( 12593 TO 12602 )	10	3
TTTTACTTTA	( 7726 TO 7735 )( 9514 TO 9523 )	10	2
TTTTACTACT	( 2937 TO 2946 )( 11660 TO 11669 )	10	2
TTTGTTTTTT	( 1331 TO 1340 )( 5708 TO 5717 )( 7240 TO 7249 )( 12800 TO 12809 )	10	4
TTTGTGGTAG	( 4500 TO 4509 )( 9615 TO 9624 )	10	2
TTTGTATTTG	( 967 TO 976 )( 6845 TO 6854 )	10	2
TTTGACTATT	( 3971 TO 3980 )( 10910 TO 10919 )	10	2
TTTCTGTGGT	( 2181 TO 2190 )( 10409 TO 10418 )	10	2
TTTATTTTTT	( 2930 TO 2939 )( 7445 TO 7454 )	10	2
TTTATTTTCT	( 11612 TO 11621 )( 13005 TO 13014 )	10	2
TTTATTTGTG	( 4916 TO 4925 )( 13036 TO 13045 )	10	2
TTTATTTATC	( 2248 TO 2257 )( 6030 TO 6039 )	10	2
TTTATTGGTT	( 828 TO 837 )( 1956 TO 1965 )	10	2
TTTATTGAAA	( 5604 TO 5613 )( 6861 TO 6870 )	10	2
TTTATTATTC	( 9298 TO 9307 )( 11264 TO 11273 )	10	2
TTTATTATGC	( 8625 TO 8634 )( 11818 TO 11827 )	10	2
TTTATTATAT	( 3151 TO 3160 )( 10250 TO 10259 )	10	2
TTTATGTTGT	( 836 TO 845 )( 12844 TO 12853 )	10	2
TTTATGGGTT	( 10579 TO 10588 )( 11970 TO 11979 )	10	2
TTTATGATTT	( 11091 TO 11100 )( 13238 TO 13247 )	10	2
TTTATAGCAG	( 6286 TO 6295 )( 12708 TO 12717 )	10	2
TTTATAAGTT	( 1373 TO 1382 )( 5723 TO 5732 )( 7534 TO 7543 )	10	3
TTTAGTTTTA	( 3065 TO 3074 )( 11861 TO 11870 )	10	2
TTTAGTTTAA	( 1664 TO 1673 )( 2691 TO 2700 )	10	2
TTTAGTGGTT	( 11684 TO 11693 )( 13316 TO 13325 )	10	2
TTTACTTTTT	( 2268 TO 2277 )( 2442 TO 2451 )	10	2
TTTACTTCAA	( 1860 TO 1869 )( 3951 TO 3960 )	10	2
TTTACATTTA	( 3833 TO 3842 )( 5212 TO 5221 )	10	2
TTTACACTAT	( 682 TO 691 )( 10449 TO 10458 )	10	2
TTTAATTTTT	( 906 TO 915 )( 2914 TO 2923 )	10	2
TTTAATTAGA	( 4950 TO 4959 )( 5643 TO 5652 )	10	2
TTGTTTTTTT	( 780 TO 789 )( 4781 TO 4790 )	10	2
TTGTTTTTTA	( 1033 TO 1042 )( 1332 TO 1341 )( 7704 TO 7713 )( 12801 TO 12810 )	10	4
TTGTTTTGGT	( 490 TO 499 )( 13196 TO 13205 )	10	2
TTGTTTTAGT	( 3061 TO 3070 )( 8025 TO 8034 )	10	2
TTGTTTCAGC	( 4071 TO 4080 )( 9263 TO 9272 )	10	2
TTGTTTATCG	( 7140 TO 7149 )( 8594 TO 8603 )	10	2
TTGTTATTTG	( 4008 TO 4017 )( 4200 TO 4209 )	10	2
TTGTGTATTA	( 4466 TO 4475 )( 6516 TO 6525 )	10	2
TTGTGGTTTT	( 3099 TO 3108 )( 10974 TO 10983 )	10	2
TTGGTGTTTT	( 8422 TO 8431 )( 12635 TO 12644 )	10	2
TTGGTGTTAT	( 1847 TO 1856 )( 3436 TO 3445 )	10	2
TTGGGTTGTT	( 485 TO 494 )( 4164 TO 4173 )	10	2
TTGGGGGGTT	( 9474 TO 9483 )( 11240 TO 11249 )	10	2
TTGGGAGTAT	( 1146 TO 1155 )( 8764 TO 8773 )	10	2
TTGGCTGGTG	( 1474 TO 1483 )( 9908 TO 9917 )	10	2
TTGGCACATT	( 11231 TO 11240 )( 13610 TO 13619 )	10	2
TTGCTTTTTA	( 1092 TO 1101 )( 10587 TO 10596 )( 12588 TO 12597 )	10	3
TTCTTTTTAA	( 12375 TO 12384 )( 13062 TO 13071 )	10	2
TTCTTTCTTT	( 3303 TO 3312 )( 11137 TO 11146 )	10	2
TTCTTTACAT	( 2963 TO 2972 )( 3830 TO 3839 )	10	2
TTCTTCTTCT	( 3040 TO 3049 )( 13394 TO 13403 )	10	2
TTCCTTTATT	( 10542 TO 10551 )( 12406 TO 12415 )	10	2
TTCATTTTTT	( 2416 TO 2425 )( 11204 TO 11213 )	10	2
TTATTTTTTT	( 995 TO 1004 )( 2931 TO 2940 )( 8936 TO 8945 )	10	3
TTATTTACTT	( 2265 TO 2274 )( 3948 TO 3957 )( 9232 TO 9241 )	10	3
TTATTTAATT	( 903 TO 912 )( 5640 TO 5649 )( 8455 TO 8464 )	10	3
TTATGTTCGT	( 169 TO 178 )( 3232 TO 3241 )	10	2
TTATGGGGTT	( 3224 TO 3233 )( 7261 TO 7270 )( 8188 TO 8197 )	10	3
TTATGCTCAA	( 1111 TO 1120 )( 1815 TO 1824 )	10	2
TTATGAAGTT	( 2461 TO 2470 )( 12964 TO 12973 )	10	2
TTATCTTTGT	( 7791 TO 7800 )( 9257 TO 9266 )	10	2
TTATCTATTA	( 5324 TO 5333 )( 5918 TO 5927 )	10	2
TTATCACTGG	( 8730 TO 8739 )( 11122 TO 11131 )	10	2
TTATCACATA	( 5383 TO 5392 )( 13122 TO 13131 )	10	2
TTATATTTTA	( 6090 TO 6099 )( 8799 TO 8808 )	10	2
TTATAAATTT	( 3551 TO 3560 )( 10733 TO 10742 )	10	2
TTAGTTTTTT	( 1040 TO 1049 )( 12504 TO 12513 )( 13537 TO 13546 )	10	3
TTACTTTTTA	( 3175 TO 3184 )( 12235 TO 12244 )	10	2
TTAATTTTTA	( 907 TO 916 )( 6523 TO 6532 )	10	2
TTAATTTAAG	( 474 TO 483 )( 6101 TO 6110 )	10	2
TTAAGTTTGT	( 892 TO 901 )( 7759 TO 7768 )	10	2
TTAAATTTAT	( 3871 TO 3880 )( 4863 TO 4872 )	10	2
TGTTTTTTAT	( 1333 TO 1342 )( 2495 TO 2504 )( 11884 TO 11893 )	10	3
TGTTTTTGTG	( 1204 TO 1213 )( 10800 TO 10809 )	10	2
TGTTTTGGTG	( 3741 TO 3750 )( 12631 TO 12640 )	10	2
TGTTTTAGCT	( 3983 TO 3992 )( 12851 TO 12860 )	10	2
TGTTTGGTTT	( 7817 TO 7826 )( 13228 TO 13237 )	10	2
TGTTATTAGT	( 10235 TO 10244 )( 12499 TO 12508 )	10	2
TGTTATAAAT	( 523 TO 532 )( 3549 TO 3558 )( 5494 TO 5503 )	10	3
TGTTAAATTT	( 4861 TO 4870 )( 6889 TO 6898 )( 6976 TO 6985 )	10	3
TGTGGTCATA	( 3937 TO 3946 )( 13476 TO 13485 )	10	2
TGTCTGGTTT	( 7877 TO 7886 )( 10208 TO 10217 )	10	2
TGTCATTTTT	( 9085 TO 9094 )( 10304 TO 10313 )	10	2
TGTATATCTG	( 6477 TO 6486 )( 12731 TO 12740 )	10	2
TGGTTTTGTT	( 10977 TO 10986 )( 11543 TO 11552 )	10	2
TGGTTTTCTT	( 10212 TO 10221 )( 10415 TO 10424 )	10	2
TGGTGTTTTT	( 12527 TO 12536 )( 12636 TO 12645 )	10	2
TGGTCTATGT	( 2187 TO 2196 )( 7586 TO 7595 )	10	2
TGGGGTTATG	( 3227 TO 3236 )( 9625 TO 9634 )	10	2
TGGGGGTTTA	( 2454 TO 2463 )( 11855 TO 11864 )	10	2
TGGGGGTTAT	( 1995 TO 2004 )( 8090 TO 8099 )	10	2
TGGGGGGTTA	( 8242 TO 8251 )( 11241 TO 11250 )	10	2
TGATTACTTT	( 2538 TO 2547 )( 10986 TO 10995 )	10	2
TGAAATTTTT	( 6277 TO 6286 )( 10725 TO 10734 )	10	2
TCTTTTGGTT	( 1767 TO 1776 )( 10421 TO 10430 )	10	2
TCTTATGTTA	( 10329 TO 10338 )( 12783 TO 12792 )	10	2
TCTATTTTGT	( 2029 TO 2038 )( 7464 TO 7473 )	10	2
TCTATTAAAT	( 3867 TO 3876 )( 5327 TO 5336 )	10	2
TCTATGTTTT	( 12942 TO 12951 )( 13401 TO 13410 )	10	2
TCTATGTTAC	( 8402 TO 8411 )( 12654 TO 12663 )	10	2
TCTAATTTGT	( 2277 TO 2286 )( 5929 TO 5938 )( 8159 TO 8168 )	10	3
TCGGGGGGGT	( 2432 TO 2441 )( 7064 TO 7073 )	10	2
TCATGTTATT	( 9720 TO 9729 )( 11531 TO 11540 )	10	2
TATTTTTTTG	( 303 TO 312 )( 996 TO 1005 )	10	2
TATTTTTTTA	( 1104 TO 1113 )( 2932 TO 2941 )( 8119 TO 8128 )	10	3
TATTTTTATT	( 9139 TO 9148 )( 9542 TO 9551 )	10	2
TATTTTCTGT	( 11925 TO 11934 )( 12034 TO 12043 )( 13580 TO 13589 )	10	3
TATTTTATCT	( 8802 TO 8811 )( 11578 TO 11587 )( 12171 TO 12180 )	10	3
TATTTACTTT	( 1544 TO 1553 )( 2266 TO 2275 )	10	2
TATTGGTGTT	( 3434 TO 3443 )( 4316 TO 4325 )( 6954 TO 6963 )	10	3
TATTGCCTTT	( 1776 TO 1785 )( 5974 TO 5983 )	10	2
TATTATTGAT	( 11039 TO 11048 )( 11073 TO 11082 )	10	2
TATTAGTATA	( 4544 TO 4553 )( 10238 TO 10247 )	10	2
TATTAATTTA	( 472 TO 481 )( 6452 TO 6461 )	10	2
TATGTTTGTT	( 2573 TO 2582 )( 10936 TO 10945 )	10	2
TATGATTTTT	( 1722 TO 1731 )( 7055 TO 7064 )( 13240 TO 13249 )	10	3
TATCTTGGGG	( 3006 TO 3015 )( 11985 TO 11994 )	10	2
TATCTTCAGT	( 857 TO 866 )( 9394 TO 9403 )	10	2
TATCTGGTTT	( 5027 TO 5036 )( 6481 TO 6490 )	10	2
TATATTATGA	( 6792 TO 6801 )( 12960 TO 12969 )	10	2
TATATCTGTT	( 5186 TO 5195 )( 12733 TO 12742 )	10	2
TATACTGTTT	( 7608 TO 7617 )( 13528 TO 13537 )	10	2
TAGTTTGTTG	( 408 TO 417 )( 6633 TO 6642 )	10	2
TAGTTTAAGT	( 2693 TO 2702 )( 7755 TO 7764 )	10	2
TAGTATTTTA	( 5137 TO 5146 )( 6138 TO 6147 )	10	2
TAGAAAATTT	( 364 TO 373 )( 12212 TO 12221 )	10	2
TACTTTAGTT	( 7729 TO 7738 )( 9043 TO 9052 )	10	2
TACTATTGGG	( 10595 TO 10604 )( 12158 TO 12167 )	10	2
TACATTGGTG	( 5254 TO 5263 )( 8842 TO 8851 )	10	2
TAATTATATT	( 5398 TO 5407 )( 8796 TO 8805 )	10	2
TAATTAAGCT	( 926 TO 935 )( 8529 TO 8538 )	10	2
TAATATTTTA	( 4478 TO 4487 )( 6300 TO 6309 )	10	2
TAATAATTTT	( 8472 TO 8481 )( 9978 TO 9987 )	10	2
TAAGTATTCT	( 1394 TO 1403 )( 10373 TO 10382 )	10	2
TAAGGATTTT	( 6166 TO 6175 )( 11669 TO 11678 )	10	2
TAACTTAGTT	( 6372 TO 6381 )( 8309 TO 8318 )	10	2
TAAATTTTTA	( 812 TO 821 )( 3554 TO 3563 )	10	2
GTTTTTTTTT	( 560 TO 569 )( 12507 TO 12516 )	10	2
GTTTTTTTTA	( 782 TO 791 )( 1458 TO 1467 )( 9449 TO 9458 )	10	3
GTTTTTTATT	( 1334 TO 1343 )( 9227 TO 9236 )( 13540 TO 13549 )	10	3
GTTTTTTATG	( 2496 TO 2505 )( 13234 TO 13243 )	10	2
GTTTTTATTT	( 991 TO 1000 )( 2245 TO 2254 )	10	2
GTTTTAATTT	( 4116 TO 4125 )( 4645 TO 4654 )	10	2
GTTTGTTTTT	( 10355 TO 10364 )( 12799 TO 12808 )	10	2
GTTTGTTAAT	( 1754 TO 1763 )( 2576 TO 2585 )	10	2
GTTTCCCTTT	( 942 TO 951 )( 1642 TO 1651 )	10	2
GTTTCATACT	( 11335 TO 11344 )( 12893 TO 12902 )	10	2
GTTTATTACT	( 321 TO 330 )( 3170 TO 3179 )	10	2
GTTGTTTTTT	( 4780 TO 4789 )( 7703 TO 7712 )	10	2
GTTGTGGTCA	( 3935 TO 3944 )( 7675 TO 7684 )	10	2
GTTGCTTTTT	( 9159 TO 9168 )( 10586 TO 10595 )	10	2
GTTATTGGCT	( 9904 TO 9913 )( 10813 TO 10822 )	10	2
GTGTTTTCTT	( 4341 TO 4350 )( 9528 TO 9537 )	10	2
GTGTGGTTTA	( 4685 TO 4694 )( 9062 TO 9071 )	10	2
GTGTATTAAT	( 6518 TO 6527 )( 9972 TO 9981 )	10	2
GTGTATGTTT	( 4110 TO 4119 )( 10933 TO 10942 )	10	2
GTCTTTTGGT	( 1766 TO 1775 )( 1908 TO 1917 )( 4395 TO 4404 )	10	3
GTCTATGTTA	( 2189 TO 2198 )( 8401 TO 8410 )	10	2
GTATTTTATT	( 1529 TO 1538 )( 1601 TO 1610 )( 6140 TO 6149 )	10	3
GGTTGTTTTT	( 4779 TO 4788 )( 5582 TO 5591 )	10	2
GGTTGTATAT	( 4351 TO 4360 )( 7717 TO 7726 )( 10024 TO 10033 )( 10059 TO 10068 )( 10094 TO 10103 )( 10129 TO 10138 )( 10164 TO 10173 )	10	7
GGTGTTTTTT	( 1948 TO 1957 )( 12528 TO 12537 )	10	2
GGGTTTATGA	( 2457 TO 2466 )( 8554 TO 8563 )( 11088 TO 11097 )	10	3
GGGTTTAGTT	( 3032 TO 3041 )( 11858 TO 11867 )	10	2
GGGGGTCTGC	( 1062 TO 1071 )( 12020 TO 12029 )	10	2
GGGGGGTTTT	( 2435 TO 2444 )( 9476 TO 9485 )	10	2
GGCTTAAGTA	( 8138 TO 8147 )( 10819 TO 10828 )	10	2
GATTACTTTG	( 2539 TO 2548 )( 6687 TO 6696 )	10	2
GATATTCTCT	( 2204 TO 2213 )( 7565 TO 7574 )	10	2
GATATAGTAA	( 2788 TO 2797 )( 8582 TO 8591 )	10	2
GATACTAGGT	( 1806 TO 1815 )( 12977 TO 12986 )	10	2
GACTTTAGTT	( 1661 TO 1670 )( 11507 TO 11516 )	10	2
CTTTTTGGTG	( 2446 TO 2455 )( 13426 TO 13435 )	10	2
CTTTTGTATT	( 8537 TO 8546 )( 12666 TO 12675 )	10	2
CTTTTCATTT	( 2483 TO 2492 )( 11256 TO 11265 )	10	2
CTTTGGCATG	( 4133 TO 4142 )( 4676 TO 4685 )	10	2
CTTTCTTCCG	( 1174 TO 1183 )( 9593 TO 9602 )	10	2
CTTTATTTAT	( 6029 TO 6038 )( 12133 TO 12142 )	10	2
CTTTATTAAG	( 5293 TO 5302 )( 6160 TO 6169 )	10	2
CTTTAATTTT	( 2913 TO 2922 )( 12757 TO 12766 )	10	2
CTGGTTTGTG	( 4496 TO 4505 )( 5030 TO 5039 )	10	2
CTATTTTATA	( 1248 TO 1257 )( 1369 TO 1378 )	10	2
CGCTTATTTT	( 9751 TO 9760 )( 11921 TO 11930 )	10	2
CCTTTGTTAT	( 1647 TO 1656 )( 3642 TO 3651 )	10	2
CCTTTATTTT	( 2928 TO 2937 )( 11610 TO 11619 )	10	2
CCACTTTAGT	( 8721 TO 8730 )( 13312 TO 13321 )	10	2
CATTAATAAA	( 4810 TO 4819 )( 6312 TO 6321 )	10	2
CATCATTTGT	( 1229 TO 1238 )( 6111 TO 6120 )	10	2
CAGTTTTTTT	( 863 TO 872 )( 1456 TO 1465 )( 13368 TO 13377 )	10	3
CAGTGGGTTT	( 4264 TO 4273 )( 11084 TO 11093 )	10	2
CAGAATTTAC	( 5629 TO 5638 )( 9103 TO 9112 )	10	2
ATTTTTTTTT	( 271 TO 280 )( 3590 TO 3599 )	10	2
ATTTTTTTAT	( 1105 TO 1114 )( 6281 TO 6290 )( 8120 TO 8129 )	10	3
ATTTTTGGTG	( 2918 TO 2927 )( 3184 TO 3193 )	10	2
ATTTTTATTG	( 910 TO 919 )( 5601 TO 5610 )	10	2
ATTTTTAATC	( 3557 TO 3566 )( 12572 TO 12581 )	10	2
ATTTTGTTTA	( 3165 TO 3174 )( 7467 TO 7476 )	10	2
ATTTTCTGTG	( 12035 TO 12044 )( 12678 TO 12687 )	10	2
ATTTTCTGTA	( 622 TO 631 )( 13581 TO 13590 )	10	2
ATTTATTTGT	( 5703 TO 5712 )( 13035 TO 13044 )	10	2
ATTGGGTTTT	( 3202 TO 3211 )( 12162 TO 12171 )	10	2
ATTCTTTCTT	( 7080 TO 7089 )( 11136 TO 11145 )	10	2
ATTCTCTTAC	( 3960 TO 3969 )( 10699 TO 10708 )	10	2
ATTATTGTTT	( 3701 TO 3710 )( 7493 TO 7502 )	10	2
ATTATATTTT	( 8798 TO 8807 )( 13617 TO 13626 )	10	2
ATTATATTAA	( 5400 TO 5409 )( 10186 TO 10195 )	10	2
ATTAGTTTGG	( 2990 TO 2999 )( 6392 TO 6401 )	10	2
ATTACTTTTT	( 3174 TO 3183 )( 10988 TO 10997 )	10	2
ATTAATTTAC	( 6453 TO 6462 )( 9956 TO 9965 )	10	2
ATTAATTTAA	( 473 TO 482 )( 2623 TO 2632 )	10	2
ATGTTGTTTT	( 7701 TO 7710 )( 12847 TO 12856 )	10	2
ATGTTATTTC	( 3532 TO 3541 )( 9722 TO 9731 )	10	2
ATGATTATTG	( 3698 TO 3707 )( 4311 TO 4320 )	10	2
ATCTTTGTTT	( 7237 TO 7246 )( 9259 TO 9268 )( 13555 TO 13564 )	10	3
ATCAATTTGT	( 10196 TO 10205 )( 13176 TO 13185 )	10	2
ATATTTTTTT	( 3588 TO 3597 )( 8118 TO 8127 )	10	2
ATATTTATTT	( 7965 TO 7974 )( 13033 TO 13042 )	10	2
ATATTGTTTT	( 1030 TO 1039 )( 12627 TO 12636 )	10	2
ATATCACTTT	( 1168 TO 1177 )( 10256 TO 10265 )	10	2
ATAATAATTT	( 4894 TO 4903 )( 8471 TO 8480 )	10	2
ATAAAGGTGT	( 4335 TO 4344 )( 10297 TO 10306 )	10	2
AGTTTTTTTT	( 1457 TO 1466 )( 12506 TO 12515 )	10	2
AGTTTGTGTA	( 2612 TO 2621 )( 7762 TO 7771 )	10	2
AGGTTTATTT	( 3909 TO 3918 )( 4913 TO 4922 )	10	2
AGGTTATGCT	( 1812 TO 1821 )( 4721 TO 4730 )	10	2
AGAAAGTATT	( 2101 TO 2110 )( 6057 TO 6066 )	10	2
ACTTTAGTTA	( 7730 TO 7739 )( 8723 TO 8732 )	10	2
ACTGTTTGCT	( 2944 TO 2953 )( 5795 TO 5804 )	10	2
ACAATGTATT	( 1596 TO 1605 )( 7486 TO 7495 )	10	2
AATTTTTTTA	( 6280 TO 6289 )( 9982 TO 9991 )	10	2
AATTTGTGTA	( 6513 TO 6522 )( 8162 TO 8171 )	10	2
AATTTATTTG	( 3874 TO 3883 )( 5702 TO 5711 )	10	2
AATTGTGTTT	( 4553 TO 4562 )( 9356 TO 9365 )	10	2
AATTCTCTTA	( 3959 TO 3968 )( 10324 TO 10333 )	10	2
AATGTTTTCT	( 3824 TO 3833 )( 4211 TO 4220 )	10	2
AATATTTATT	( 6014 TO 6023 )( 7964 TO 7973 )	10	2
AATAATTTAT	( 5699 TO 5708 )( 7001 TO 7010 )( 13025 TO 13034 )	10	3
AAGTAATTAT	( 5395 TO 5404 )( 12311 TO 12320 )	10	2
AAGGTGTTTT	( 4338 TO 4347 )( 13602 TO 13611 )	10	2
AAATTTGGGT	( 4160 TO 4169 )( 6893 TO 6902 )	10	2
> REVERSE	START TO END	LENGHT (bp)	FRECUENCY REPEAT
TAAGATTAGT	(2986 TO 2995)	10	2
CACTAAAGAT	(36 TO 45)	10	2
GTTTAAATAA	(6996 TO 7005)	10	2
TTACAAAGTT	(1503 TO 1512)	10	2
AAGTAAACTA	(8143 TO 8152)	10	2
ATAGAAAGTAT	(2099 TO 2109)	11	2
GTATAATAAAGGAAA	(2821 TO 2835)	15	2
TAAGATGAAA	(2652 TO 2661)	10	2
AATAAAGGAA	(2825 TO 2834)	10	2
TTATTTACTT	(2265 TO 2274)(9232 TO 9241)	10	3
AATACAGAAT	(5625 TO 5634)	10	2
TTTTTTTACT	(2376 TO 2385)	10	2
TGAATTTGTG	(6511 TO 6520)	10	2
ACTAGGTTAT	(1809 TO 1818)	10	2
ACTTAGTTTT	(6374 TO 6383)	10	2
CTTTTTTATT	(8226 TO 8235)(1782 TO 1791)	10	3
TAAAAGAACCA	(1559 TO 1569)	11	2
AAATTTAATT	(5361 TO 5370)(10737 TO 10746)	10	3
ACATTGTTACTA	(600 TO 611)	12	2
TAACATTTAG	(6602 TO 6611)	10	2
ATTAAATTTAT	(3870 TO 3880)	11	2
ACACAAGCAT	(7643 TO 7652)	10	2
CAAACAGTAT	(7403 TO 7412)	10	2
CATAAAATCT	(8049 TO 8058)	10	2
GAGTATGTTT	(1150 TO 1159)	10	2
ATACATTGTTACTA	(598 TO 611)	14	2
ATTAAATTTA	(3870 TO 3879)	10	2
TCTTTTTTAT	(1281 TO 1290)	10	2
TAAAATAATT	(6252 TO 6261)	10	2
AAGGGACCAA	(1831 TO 1840)	10	2
ATTTTACTGT	(1977 TO 1986)	10	2
TTCTTTCAAT	(10145 TO 10154)(10110 TO 10119)(10040 TO 10049)(10075 TO 10084)	10	5
TAATAAAAAA	(4813 TO 4822)	10	2
TTTATTACTT	(3171 TO 3180)	10	2
AAATATTTAC	(1541 TO 1550)	10	2
TTTATAGTTTA	(4943 TO 4953)	11	2
AATAGTAATGA	(6769 TO 6779)	11	2
ATAATTAAGC	(925 TO 934)	10	2
TACTTTTCAT	(11254 TO 11263)	10	2
AAAATAATTT	(5697 TO 5706)	10	2
TAGCCCCAGAT	(6715 TO 6725)	11	2
TAAATCAGGGG	(4972 TO 4982)	11	2
TTAATTATAAA	(72 TO 82)	11	2
CAATTTGCCA	(9496 TO 9505)	10	2
CACATAATAA	(5387 TO 5396)	10	2
TGTTTTTAATA	(3721 TO 3731)	11	2
ACCATTTTTTT	(268 TO 278)	11	2
TTTTTACTTGC	(2378 TO 2388)	11	2
ATAGAAGTAA	(7328 TO 7337)	10	2
TTTTATGCTCA	(1109 TO 1119)	11	2
AATGCTAGCTT	(2905 TO 2915)	11	2
CAGATTTTAT	(1214 TO 1223)	10	2
AAGTAGACTA	(3326 TO 3335)	10	2
TTTTACTGATA	(10944 TO 10954)	11	2
TTAGTTATGT	(294 TO 303)(429 TO 438)	10	3
AACAATGTTA	(8301 TO 8310)	10	2
TTATTAAAAA	(5441 TO 5450)(1534 TO 1543)	10	3
AGCATAATAA	(7366 TO 7375)	10	2
TTTCATAAAA	(8046 TO 8055)	10	2
GTGGCTTACT	(5337 TO 5346)	10	2
AGCCTGTCTT	(4390 TO 4399)	10	2
GCATAATAAC	(7367 TO 7376)	10	2
TTTATGGTTGCTGCT	(9640 TO 9654)	15	2
TTATGATACGG	(3496 TO 3506)	11	2
AGAATTTACA	(5630 TO 5639)	10	2
CCCCGCGAAT	(350 TO 359)	10	2
AAGCCGTTGCC	(7115 TO 7125)	11	2
TTAAATTTAT	(6978 TO 6987)(4863 TO 4872)	10	3
ACCAAACAGT	(7401 TO 7410)	10	2
ATTTCCATATT	(5452 TO 5462)	11	2
ATTTAATATAA	(6364 TO 6374)	11	2
ACCACACCCC	(344 TO 353)	10	2
TGAAATTTTCT	(6777 TO 6787)	11	2
TTATATTATG	(6791 TO 6800)	10	2
CAAGTAAAAA	(5691 TO 5700)	10	2
TTACTGTCAA	(3282 TO 3291)	10	2
AAAGAAACAG	(3253 TO 3262)	10	2
TTTAATTTAT	(4647 TO 4656)(11813 TO 11822)	10	3
TTAGTTAAAT	(8313 TO 8322)	10	2
AATCTTAAAATT	(3390 TO 3401)	12	2
ATGTTTTTAA	(1732 TO 1741)(12945 TO 12954)	10	3
TAATAAAGTAA	(7335 TO 7345)	11	2
TTGTGTGCCT	(5035 TO 5044)	10	2
TTTATTAAAA	(1533 TO 1542)(5440 TO 5449)	10	3
GTTAGTACAC	(586 TO 595)	10	2
ATGACTAATC	(3384 TO 3393)	10	2
AACACTAAGT	(3347 TO 3356)	10	2
TTTAGCATTA	(6123 TO 6132)	10	2
TTAGCAACACT	(8249 TO 8259)	11	2
GGGTGGGGGC	(4052 TO 4061)	10	2
TACTTATTTACTT	(3945 TO 3957)	13	2
AGATACCCCA	(6344 TO 6353)	10	2
ATTAAAAATA	(1536 TO 1545)	10	2
TTGTCGGGGG	(8130 TO 8139)	10	2
TTACGAGTGT	(3022 TO 3031)	10	2
CAGTAAAAAA	(11006 TO 11015)	10	2
ATTATGTGAT	(1426 TO 1435)	10	2
TTATTTTAAT	(3524 TO 3533)	10	2
ATTTTTTTACT	(2933 TO 2943)	11	2

## Sheet: Hoja6
Supplementary Data 6. Results of BIC model selection conducted in PartitionFinder for different partitions of the dataset, showing the chosen models in MrBayes and IQ-TREE analyses. The table delineates the model configurations for various gene regions (Cytb, COI, ND1) across specific positions.
Partition	Mrbayes	IQtree
Cytb, position 1	nst=6, invgamma	TRN+I+G
Cytb, position 2	nst=6, propinv	TRN+I
Cytb, position 3	nst=6, invgamma	GTR+I+G
COI, position 1		GTR+I+G
COI, position 2		TRN+I+G
COI, position 3	nst=6, propinv	TRN+I
ND1, position 1	nst=6, propinv	TRN+I
ND1, position 2	nst=6, invgamma	GTR+I+G
ND1, position 3		TRN+I+G
